# Supplementary material for: ﻿Delimitation of the widely distributed Palearctic Stenodema species (Hemiptera, Heteroptera, Miridae): insights from molecular and morphological data
Source: PubMed Central journal article supplement (PMC11336388; doi:10.3897/zookeys.1209.124766), 2024-08-13
Supplement: zookeys-1209-245_article-124766__-s002.pdf [file zookeys-1209-245_article-124766__-s002.pdf]

Voucher information for the specimens used for the comparison and phylogenies of the Palearctic species

| Species                    | Voucher | COI Genbank accession number | 16S Genbank accession number | Country                   | USI number        |
|----------------------------|---------|------------------------------|------------------------------|---------------------------|-------------------|
| <i>Leptopterna sp.</i>     | ST45    | PP273511                     | PP273719                     | Russia/ Orenburg Prov.    | ZISP_ENT 00013657 |
| <i>Trigonotylus sp.</i>    | ST41    | PP273512                     | PP273737                     | Russia/ Kalmykia Rep.     | ZISP_ENT 00013652 |
| <i>Stenodema calcarata</i> | ST31    | PP273513                     | PP273744                     | Russia/ Primorskiy Terr.  | ZISP_ENT 00013641 |
| <i>Stenodema calcarata</i> | ST16    | PP273514                     | PP273734                     | Russia/ Altay Prov.       | ZISP_ENT 00003719 |
| <i>Stenodema calcarata</i> | ST35    |                              |                              | Russia/ Amur Prov.        | ZISP_ENT 00013645 |
| <i>Stenodema calcarata</i> | ST04    | PP273515                     | PP273720                     | Russia/ Bashkortostan Rep | ZISP_ENT 00013651 |
| <i>Stenodema calcarata</i> | ST37    | PP273516                     | PP273747                     | Russia/ Belgorod Prov     | ZISP_ENT 00013660 |
| <i>Stenodema calcarata</i> | ST06    | PP273518                     | PP273726                     | Russia/ Leningrad Prov.   | ZISP_ENT 00013662 |
| <i>Stenodema calcarata</i> | ST02    | PP273519                     | PP273721                     | Russia/ Murmansk Prov.    | ZISP_ENT 00013658 |
| <i>Stenodema calcarata</i> | ST17    |                              | PP273735                     | Russia/Stavropol Prov.    | ZISP_ENT 00003720 |
| <i>Stenodema calcarata</i> | ST14    | PP273520                     | PP273733                     | Russia/ Ulyanovsk Prov.   | ZISP_ENT 00003717 |
| <i>Stenodema calcarata</i> | ST26    | PP273521                     | PP273740                     | Turkey                    | ZISP_ENT 00013633 |
| <i>Stenodema calcarata</i> | 28IRAN  | PP273522                     |                              | Iran                      |                   |
| <i>Stenodema calcarata</i> | ST07    | PP273523                     | PP273727                     | Georgia                   | ZISP_ENT 00013647 |
| <i>Stenodema calcarata</i> | ST43    | PP273517                     | PP273751                     | France                    | ZISP_ENT 00013653 |
| <i>Stenodema calcarata</i> |         | KM022989                     |                              | Germany                   |                   |
| <i>Stenodema calcarata</i> |         | KM022595                     |                              | Germany                   |                   |
| <i>Stenodema calcarata</i> |         | KM021949                     |                              | Germany                   |                   |
| <i>Stenodema calcarata</i> |         | KM021898                     |                              | Germany.                  |                   |
| <i>Stenodema calcarata</i> |         | KM021515                     |                              | Germany.                  |                   |
| <i>Stenodema calcarata</i> |         | KM023021                     |                              | Germany.                  |                   |
| <i>Stenodema calcarata</i> |         | KM023068                     |                              | Germany                   |                   |
| <i>Stenodema calcarata</i> |         | KM021960                     |                              | Germany                   |                   |
| <i>Stenodema calcarata</i> |         | KM022869                     |                              | Germany                   |                   |
| <i>Stenodema calcarata</i> |         | OL663374                     |                              | South Korea               |                   |
| <i>Stenodema calcarata</i> |         | OL663375                     |                              | South Korea               |                   |
| <i>Stenodema calcarata</i> |         | OL663376                     |                              | South Korea               |                   |
| <i>Stenodema calcarata</i> |         |                              | MF667329                     | South Korea               |                   |
| <i>Stenodema calcarata</i> |         | MZ631685                     |                              | Finland                   |                   |

|                            |        |          |          |                                  |                   |
|----------------------------|--------|----------|----------|----------------------------------|-------------------|
| <i>Stenodema calcarata</i> |        | MZ656495 |          | Finland                          |                   |
| <i>Stenodema calcarata</i> |        | MZ656669 |          | Finland.                         |                   |
| <i>Stenodema holsata</i>   | ST09   | PP273524 | PP273729 | Russia/ Karachay-Cherkessia Rep. | ZISP_ENT 00013664 |
| <i>Stenodema holsata</i>   | ST01   | PP273525 | PP273722 | Russia/ Murmansk Prov.           | ZISP_ENT 00013663 |
| <i>Stenodema holsata</i>   | ST46   | PP273526 | PP273752 | Russia/ Murmansk Prov.           | ZISP_ENT 00013654 |
| <i>Stenodema holsata</i>   | ST03   | PP273527 | PP273723 | Norway                           | ZISP_ENT 00013667 |
| <i>Stenodema holsata</i>   |        | KM022857 |          | Germany                          |                   |
| <i>Stenodema holsata</i>   |        | KM022402 |          | Germany                          |                   |
| <i>Stenodema holsata</i>   |        | KM021829 |          | Germany                          |                   |
| <i>Stenodema holsata</i>   |        | KM021735 |          | Germany                          |                   |
| <i>Stenodema holsata</i>   |        | KJ541522 |          | France                           |                   |
| <i>Stenodema holsata</i>   |        | KJ541526 |          | France                           |                   |
| <i>Stenodema holsata</i>   |        | KJ541527 |          | France                           |                   |
| <i>Stenodema holsata</i>   |        | KJ541528 |          | France.                          |                   |
| <i>Stenodema holsata</i>   |        | KM021489 |          | Germany                          |                   |
| <i>Stenodema holsata</i>   |        | KM022581 |          | Germany                          |                   |
| <i>Stenodema holsata</i>   |        | KM287254 |          | Norway                           |                   |
| <i>Stenodema holsata</i>   |        | KJ541538 |          | France                           |                   |
| <i>Stenodema holsata</i>   |        | KJ541590 |          | France                           |                   |
| <i>Stenodema holsata</i>   |        | KJ541604 |          | France                           |                   |
| <i>Stenodema holsata</i>   |        | MZ633438 |          | Finland                          |                   |
| <i>Stenodema holsata</i>   |        | MZ632032 |          | Finland                          |                   |
| <i>Stenodema holsata</i>   |        | MZ632415 |          | Finland                          |                   |
| <i>Stenodema laevigata</i> | ST11   | PP273528 | PP273730 | Russia/Bryansk Prov.             | ZISP_ENT 00013666 |
| <i>Stenodema laevigata</i> | ST38   | PP273529 | PP273748 | Russia/Belgorod Prov.            | ZISP_ENT 00013659 |
| <i>Stenodema laevigata</i> | ST08   | PP273530 | PP273728 | Crimea Rep.                      | ZISP_ENT 00013648 |
| <i>Stenodema laevigata</i> | ST39   | PP273532 | PP273749 | Russia/Saratov Prov.             | ZISP_ENT 00013649 |
| <i>Stenodema laevigata</i> | ST25   | PP273533 | PP273725 | Russia/Ulyanovsk Prov.           | ZISP_ENT 00013634 |
| <i>Stenodema laevigata</i> | ST05   | PP273534 | PP273724 | Russia/Voronezh Prov.            | ZISP_ENT 00013656 |
| <i>Stenodema laevigata</i> | ST42   |          | PP273750 | Greece                           | ZISP_ENT 00013650 |
| <i>Stenodema laevigata</i> | 01IRAN |          | PP273753 | Iran                             |                   |
| <i>Stenodema laevigata</i> | 15IRAN | PP273535 | PP273754 | Iran                             |                   |

|                              |      |          |          |                         |                   |
|------------------------------|------|----------|----------|-------------------------|-------------------|
| <i>Stenodema laevigata</i>   |      | KM022395 |          | Germany                 |                   |
| <i>Stenodema laevigata</i>   |      | KM022947 |          | Germany                 |                   |
| <i>Stenodema laevigata</i>   |      | KM021476 |          | Germany                 |                   |
| <i>Stenodema laevigata</i>   |      | KM021700 |          | Germany                 |                   |
| <i>Stenodema laevigata</i>   |      | KM021771 |          | Germany                 |                   |
| <i>Stenodema laevigata</i>   |      | KM022371 |          | Germany                 |                   |
| <i>Stenodema laevigata</i>   |      | KJ541531 |          | France                  |                   |
| <i>Stenodema laevigata</i>   |      | KJ541532 |          | France                  |                   |
| <i>Stenodema laevigata</i>   |      | KM023087 |          | Germany                 |                   |
| <i>Stenodema laevigata</i>   |      | KM022751 |          | Germany                 |                   |
| <i>Stenodema laevigata</i>   |      | KM022142 |          | Germany                 |                   |
| <i>Stenodema laevigata</i>   |      | MW535964 |          | Portugal                |                   |
| <i>Stenodema laevigata</i>   |      | MW536092 |          | Portugal                |                   |
| <i>Stenodema laevigata</i>   |      | KJ541537 |          | France                  |                   |
| <i>Stenodema laevigata</i>   |      | KJ541577 |          | France                  |                   |
| <i>Stenodema laevigata</i>   |      | MZ630187 |          | Finland                 |                   |
| <i>Stenodema laevigata</i>   |      | MZ629499 |          | Finland                 |                   |
| <i>Stenodema laevigata</i>   | ST24 |          | PP273739 | Russia/Pskov Prov.      | ZISP_ENT 00003727 |
| <i>Stenodema pilosipes</i>   |      | KR581562 |          | Canada/Alberta          |                   |
| <i>Stenodema pilosipes</i>   |      | KR032850 |          | Canada/British Columbia |                   |
| <i>Stenodema rubrinervis</i> |      | GU194832 | GU194603 | South Korea             |                   |
| <i>Stenodema rubrinervis</i> |      | KY367176 |          | South Korea             |                   |
| <i>Stenodema rubrinervis</i> |      | KY367178 |          | South Korea             |                   |
| <i>Stenodema rubrinervis</i> |      | GQ292099 |          | South Korea             |                   |
| <i>Stenodema rubrinervis</i> |      | KY367177 |          | South Korea             |                   |
| <i>Stenodema rubrinervis</i> |      |          | MF667330 | South Korea             |                   |
| <i>Stenodema sericans</i>    |      | KM022559 |          | Germany                 |                   |
| <i>Stenodema sericans</i>    |      | KJ541615 |          | France                  |                   |
| <i>Stenodema sericans</i>    |      | KJ541632 |          | France                  |                   |
| <i>Stenodema sibirica</i>    | ST36 | PP273537 | PP273746 | Russia/Khabarovsk Terr. | ZISP_ENT 00013646 |
| <i>Stenodema sibirica</i>    | ST28 | PP273536 | PP273743 | Russia/Altay Rep.       | ZISP_ENT 00013638 |
| <i>Stenodema sibirica</i>    | ST32 | PP273538 | PP273745 | Russia/Altay Rep.       | ZISP_ENT 00013642 |

|                             |        |          |          |                         |                   |
|-----------------------------|--------|----------|----------|-------------------------|-------------------|
| <i>Stenodema sibirica</i>   |        | GU194833 | GU194604 | South Korea             |                   |
| <i>Stenodema sibirica</i>   |        | KY367180 |          | South Korea             |                   |
| <i>Stenodema sibirica</i>   |        | GQ292111 |          | South Korea             |                   |
| <i>Stenodema sibirica</i>   |        | KY367179 |          | South Korea             |                   |
| <i>Stenodema sibirica</i>   |        |          | MF667331 | South Korea             |                   |
| <i>Stenodema trispinosa</i> | ST12   | PP273539 | PP273732 | Russia/Orenburg Prov.   | ZISP_ENT 00003715 |
| <i>Stenodema trispinosa</i> | ST29   |          | PP273742 | Russia/Yakutia Rep      | ZISP_ENT 00013639 |
| <i>Stenodema trispinosa</i> | ST30   | PP273540 | PP273736 | Russia/Yakutia Rep.     | ZISP_ENT 00013640 |
| <i>Stenodema trispinosa</i> |        | MZ656655 |          | Finland                 |                   |
| <i>Stenodema trispinosa</i> |        | MZ660633 |          | Finland                 |                   |
| <i>Stenodema trispinosa</i> |        | KR581161 |          | Canada                  |                   |
| <i>Stenodema trispinosa</i> |        | KR032213 |          | Canada                  |                   |
| <i>Stenodema trispinosa</i> |        | KR034997 |          | Canada                  |                   |
| <i>Stenodema trispinosa</i> |        | MF937672 |          | Canada                  |                   |
| <i>Stenodema trispinosa</i> |        | MF938746 |          | Canada                  |                   |
| <i>Stenodema trispinosa</i> |        | MF930501 |          | Canada                  |                   |
| <i>Stenodema trispinosa</i> |        | KR574809 |          | Canada                  |                   |
| <i>Stenodema trispinosa</i> |        | MF937040 |          | Canada                  |                   |
| <i>Stenodema trispinosa</i> |        | KR573601 |          | Canada                  |                   |
| <i>Stenodema trispinosa</i> |        | KR575702 |          | Canada                  |                   |
| <i>Stenodema trispinosa</i> |        | KU876242 |          | USA/Alaska              |                   |
| <i>Stenodema trispinosa</i> |        | KR582246 |          | Canada                  |                   |
| <i>Stenodema trispinosa</i> |        | MG164925 |          | Canada                  |                   |
| <i>Stenodema_turanica</i>   | 53IRAN | PP273541 |          | Iran                    |                   |
| <i>Stenodema_turanica</i>   | 54IRAN | PP273542 |          | Iran                    |                   |
| <i>Stenodema_turanica</i>   | ST27   | PP273543 | PP273741 | Russia/Tyva Rep.        | ZISP_ENT 00013635 |
| <i>Stenodema vicina</i>     |        | KR034171 |          | Canada/Nova Scotia      |                   |
| <i>Stenodema vicina</i>     |        | KR575728 |          | Canada/Ontario          |                   |
| <i>Stenodema vicina</i>     |        | KR583053 |          | Canada/Ontario          |                   |
| <i>Stenodema vicina</i>     |        | KR574511 |          | Canada/Ontario          |                   |
| <i>Stenodema vicina</i>     |        | MF936192 |          | Canada/British Columbia |                   |

|                         |      |          |          |                                  |                   |
|-------------------------|------|----------|----------|----------------------------------|-------------------|
| <i>Stenodema virens</i> | ST10 | PP273544 | PP273731 | Russia/ Karachay-Cherkessia Rep. | ZISP_ENT 00013665 |
| <i>Stenodema virens</i> | ST21 | PP273545 | PP273738 | Russia/ Irkutsk Prov.            | ZISP_ENT 00003724 |
| <i>Stenodema virens</i> | ST40 | PP273546 |          | Georgia                          | ZISP_ENT 00013661 |
| <i>Stenodema virens</i> |      | MZ657175 |          | Finland                          |                   |

## References

Namyatova, A. A., Schwartz, M. D., & Cassis, G. (2021). Determining the position of *Diomocoris*, *Micromimetus* and *Taylorilygus* in the *Lygus*-complex based on molecular data and first records of *Diomocoris* and *Micromimetus* from Australia, including four new species (Insecta: Hemiptera: Miridae: Mirinae). *Invertebrate Systematics*, 35(1), 90-131.

Roehrdanz, R., Cameron, S. L., Toutges, M., & Wichmann, S. S. (2016). The complete mitochondrial genome of the tarnished plant bug, *Lygus lineolaris* (Heteroptera: Miridae). *Mitochondrial DNA Part A*, 27(1), 48-49.

Wang, P., Li, H., Wang, Y., Zhang, J. H., Dai, X., Chang, J., ... & Cai, W. Z. (2014). The mitochondrial genome of the plant bug *Apolygus lucorum* (Hemiptera: Miridae): presently known as the smallest in Heteroptera. *Insect science*, 21(2), 159-173.
