# Supplementary material for: ﻿Delimitation of the widely distributed Palearctic Stenodema species (Hemiptera, Heteroptera, Miridae): insights from molecular and morphological data
Source: PubMed Central journal article supplement (PMC11336388; doi:10.3897/zookeys.1209.124766), 2024-08-13
Supplement: zookeys-1209-245_article-124766__-s003.pdf [file zookeys-1209-245_article-124766__-s003.pdf]

# COI-based RaxML tree for full dataset (124 terminals)

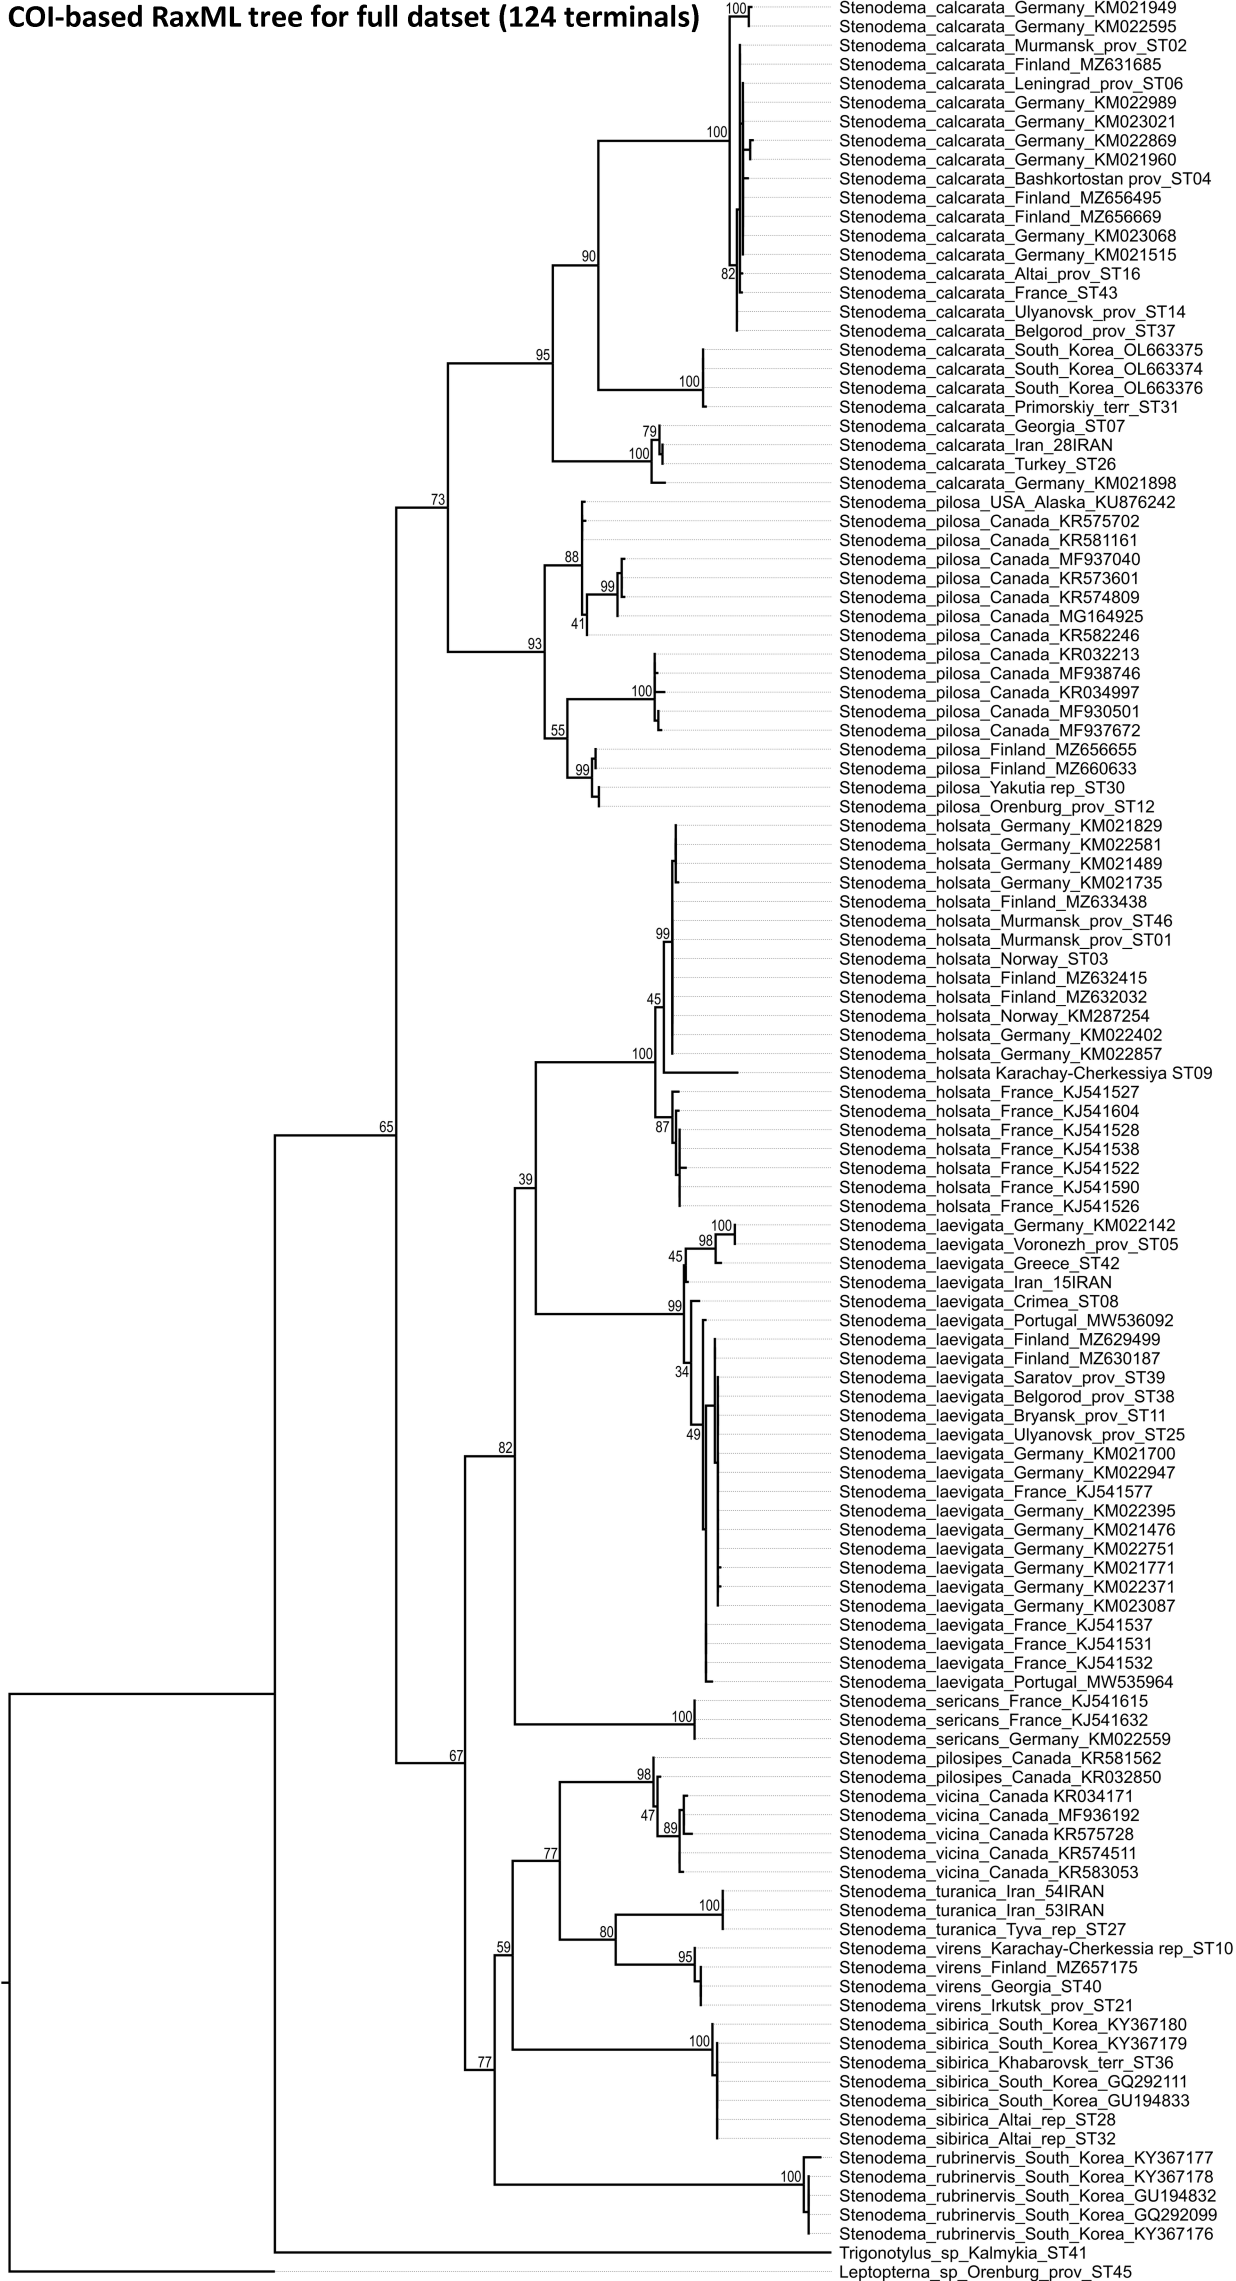

0.05

**16S-based RaxML tree,  
40 terminals**

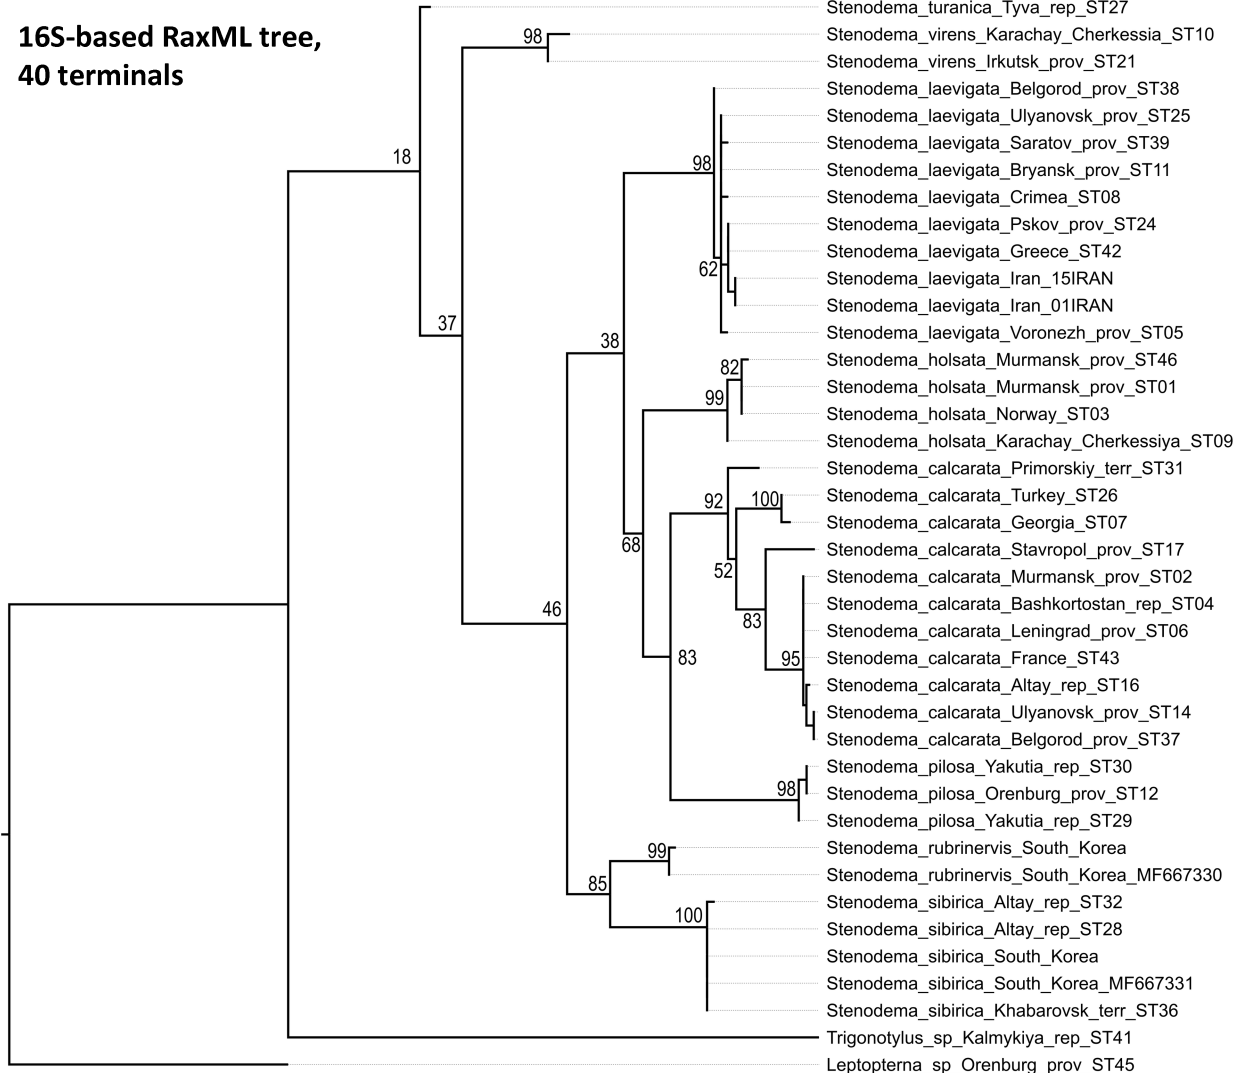

0.04

**Combined (COI+16S) RaxML tree for all taxa (124 terminals)**

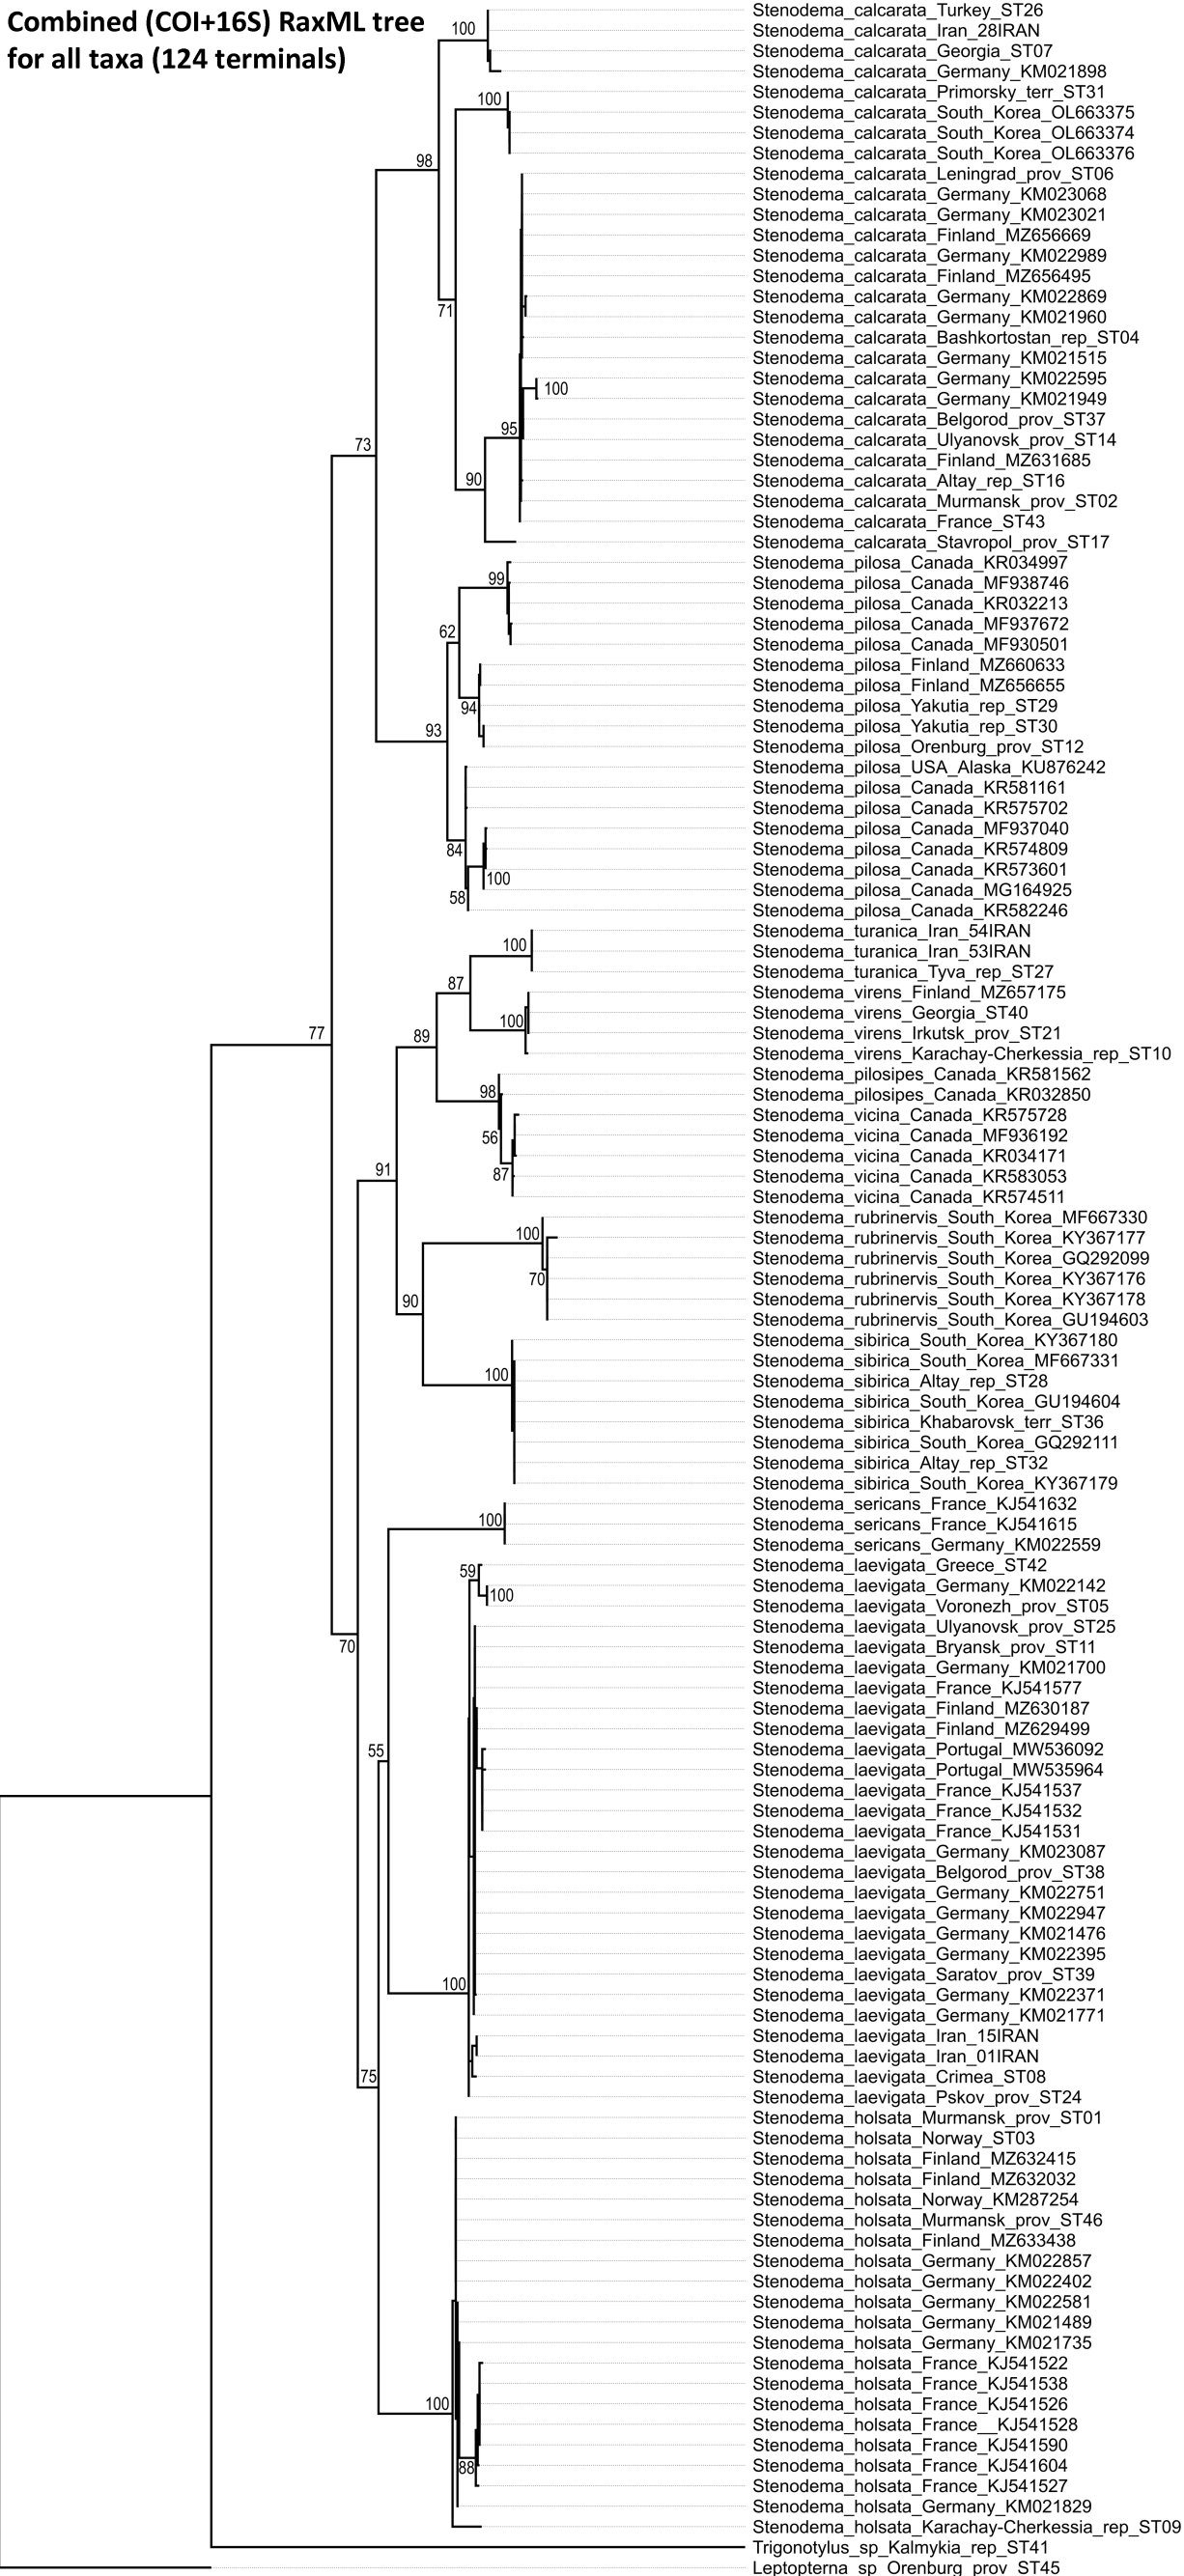

0.2

**Combined (COI+16S) RaxML tree  
for reduced dataset  
(34 terminals)**

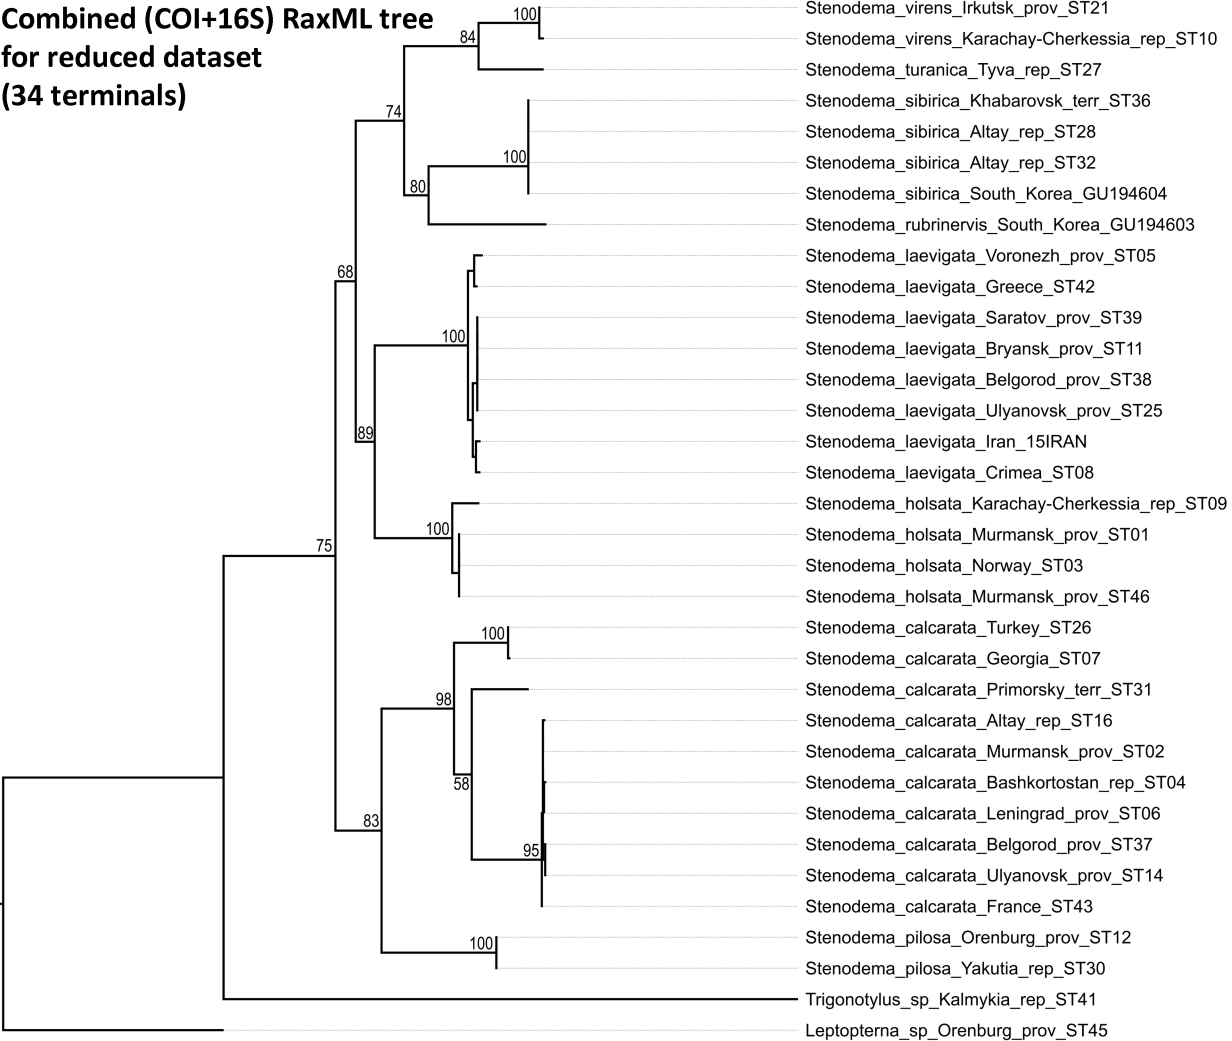

0.2
