# Supplementary material for: ﻿Delimitation of the widely distributed Palearctic Stenodema species (Hemiptera, Heteroptera, Miridae): insights from molecular and morphological data
Source: PubMed Central journal article supplement (PMC11336388; doi:10.3897/zookeys.1209.124766), 2024-08-13
Supplement: zookeys-1209-245_article-124766__-s004.pdf [file zookeys-1209-245_article-124766__-s004.pdf]

## Supplementary material 4.

### Interspecific and intraspecific P-distances for COI

|                    | within<br>species<br>distances | between species differences |                |                  |                  |                    |                 |               |                 |                 |               |
|--------------------|--------------------------------|-----------------------------|----------------|------------------|------------------|--------------------|-----------------|---------------|-----------------|-----------------|---------------|
|                    |                                | <i>calcarata</i>            | <i>holsata</i> | <i>laevigata</i> | <i>pilosipes</i> | <i>rubrinervis</i> | <i>sibirica</i> | <i>pilosa</i> | <i>turanica</i> | <i>sericans</i> | <i>vicina</i> |
| <i>calcarata</i>   | 0.0398                         |                             |                |                  |                  |                    |                 |               |                 |                 |               |
| <i>holsata</i>     | 0.0117                         | 0.1193                      |                |                  |                  |                    |                 |               |                 |                 |               |
| <i>laevigata</i>   | 0.0085                         | 0.1287                      | 0.0901         |                  |                  |                    |                 |               |                 |                 |               |
| <i>pilosipes</i>   | 0.0033                         | 0.1111                      | 0.0974         | 0.0963           |                  |                    |                 |               |                 |                 |               |
| <i>rubrinervis</i> | 0.0039                         | 0.1473                      | 0.1178         | 0.1314           | 0.1160           |                    |                 |               |                 |                 |               |
| <i>sibirica</i>    | 0.0006                         | 0.1273                      | 0.1107         | 0.1227           | 0.0957           | 0.1137             |                 |               |                 |                 |               |
| <i>pilosa</i>      | 0.0365                         | 0.1013                      | 0.1211         | 0.1146           | 0.1132           | 0.1512             | 0.1283          |               |                 |                 |               |
| <i>turanica</i>    | 0                              | 0.1193                      | 0.1046         | 0.1008           | 0.0729           | 0.1135             | 0.1058          | 0.1147        |                 |                 |               |
| <i>sericans</i>    | 0                              | 0.1361                      | 0.0933         | 0.0943           | 0.0961           | 0.1167             | 0.1114          | 0.1175        | 0.1054          |                 |               |
| <i>vicina</i>      | 0.004                          | 0.1134                      | 0.0959         | 0.0939           | 0.0119           | 0.1114             | 0.1004          | 0.1108        | 0.0704          | 0.1033          |               |
| <i>virens</i>      | 0.0011                         | 0.1137                      | 0.1080         | 0.1166           | 0.0731           | 0.0991             | 0.1002          | 0.1221        | 0.0622          | 0.1146          | 0.0688        |

**Interspecific and intraspecific Kimura-2-parameter distances for COI**

|                    | within<br>species<br>distances | between species differences |                |                  |                  |                    |                 |               |                 |                 |               |
|--------------------|--------------------------------|-----------------------------|----------------|------------------|------------------|--------------------|-----------------|---------------|-----------------|-----------------|---------------|
|                    |                                | <i>calcarata</i>            | <i>holsata</i> | <i>laevigata</i> | <i>pilosipes</i> | <i>rubrinervis</i> | <i>sibirica</i> | <i>pilosa</i> | <i>turanica</i> | <i>sericans</i> | <i>vicina</i> |
| <i>calcarata</i>   | 0.0424                         |                             |                |                  |                  |                    |                 |               |                 |                 |               |
| <i>holsata</i>     | 0.0119                         | 0.1312                      |                |                  |                  |                    |                 |               |                 |                 |               |
| <i>laevigata</i>   | 0.0086                         | 0.1425                      | 0.0974         |                  |                  |                    |                 |               |                 |                 |               |
| <i>pilosipes</i>   | 0.0033                         | 0.1210                      | 0.1055         | 0.1045           |                  |                    |                 |               |                 |                 |               |
| <i>rubrinervis</i> | 0.004                          | 0.1667                      | 0.1296         | 0.1472           | 0.1280           |                    |                 |               |                 |                 |               |
| <i>sibirica</i>    | 0.0006                         | 0.1411                      | 0.1211         | 0.1359           | 0.1036           | 0.1251             |                 |               |                 |                 |               |
| <i>pilosa</i>      | 0.0381                         | 0.1105                      | 0.1333         | 0.1256           | 0.1239           | 0.1720             | 0.1424          |               |                 |                 |               |
| <i>turanica</i>    | 0                              | 0.1310                      | 0.1139         | 0.1097           | 0.0775           | 0.1246             | 0.1153          | 0.1256        |                 |                 |               |
| <i>sericans</i>    | 0                              | 0.1517                      | 0.1012         | 0.1022           | 0.1037           | 0.1284             | 0.1219          | 0.1288        | 0.1143          |                 |               |
| <i>vicina</i>      | 0.004                          | 0.1239                      | 0.1037         | 0.1014           | 0.0120           | 0.1224             | 0.1093          | 0.1208        | 0.0746          | 0.1122          |               |
| <i>virens</i>      | 0.0011                         | 0.1240                      | 0.1181         | 0.1288           | 0.0780           | 0.1079             | 0.1089          | 0.1348        | 0.0656          | 0.1261          | 0.0731        |

**Interspecific and intraspecific P-distances for 16S rRNA**

|                    | within<br>species<br>distances | between species differences |                |                  |                    |                 |               |                 |
|--------------------|--------------------------------|-----------------------------|----------------|------------------|--------------------|-----------------|---------------|-----------------|
|                    |                                | <i>calcarata</i>            | <i>holsata</i> | <i>laevigata</i> | <i>rubrinervis</i> | <i>sibirica</i> | <i>pilosa</i> | <i>turanica</i> |
| <i>calcarata</i>   | 0.0214                         |                             |                |                  |                    |                 |               |                 |
| <i>holsata</i>     | 0.004                          | 0.0695                      |                |                  |                    |                 |               |                 |
| <i>laevigata</i>   | 0.0039                         | 0.0763                      | 0.0679         |                  |                    |                 |               |                 |
| <i>rubrinervis</i> | 0.0026                         | 0.0828                      | 0.0761         | 0.0698           |                    |                 |               |                 |
| <i>sibirica</i>    | 0.0011                         | 0.0874                      | 0.0737         | 0.0712           | 0.0509             |                 |               |                 |
| <i>pilosa</i>      | 0.001                          | 0.0620                      | 0.0683         | 0.0733           | 0.0869             | 0.0895          |               |                 |
| <i>turanica</i>    | N/A                            | 0.0928                      | 0.0822         | 0.0823           | 0.0710             | 0.0792          | 0.0976        |                 |
| <i>virens</i>      | 0.0083                         | 0.1008                      | 0.0886         | 0.0954           | 0.0736             | 0.0896          | 0.1133        | 0.0460          |

**Interspecific and intraspecific Kimura-2-parameter distances for 16S rRNA**

|                    | within<br>species<br>distances | between species differences |                |                  |                    |                 |               |                 |
|--------------------|--------------------------------|-----------------------------|----------------|------------------|--------------------|-----------------|---------------|-----------------|
|                    |                                | <i>calcarata</i>            | <i>holsata</i> | <i>laevigata</i> | <i>rubrinervis</i> | <i>sibirica</i> | <i>pilosa</i> | <i>turanica</i> |
| <i>calcarata</i>   | 0.022                          |                             |                |                  |                    |                 |               |                 |
| <i>holsata</i>     | 0.004                          | 0.0732                      |                |                  |                    |                 |               |                 |
| <i>laevigata</i>   | 0.0039                         | 0.0806                      | 0.0712         |                  |                    |                 |               |                 |
| <i>rubrinervis</i> | 0.0026                         | 0.0878                      | 0.0802         | 0.0733           |                    |                 |               |                 |
| <i>sibirica</i>    | 0.0011                         | 0.0930                      | 0.0776         | 0.0749           | 0.0527             |                 |               |                 |
| <i>pilosa</i>      | 0.001                          | 0.0648                      | 0.0717         | 0.0771           | 0.0924             | 0.0953          |               |                 |
| <i>turanica</i>    | N/A                            | 0.0993                      | 0.0872         | 0.0872           | 0.0747             | 0.0838          | 0.1046        |                 |
| <i>virens</i>      | 0.0083                         | 0.1086                      | 0.0944         | 0.1021           | 0.0775             | 0.0955          | 0.1229        | 0.0478          |

**P-distances for COI between *Stenodema calcarata* groups**

|                  | West Asian group | East Asian group | German group |
|------------------|------------------|------------------|--------------|
| West Asian group |                  |                  |              |
| East Asian group | 0.0675           |                  |              |
| German group     | 0.0801           | 0.0791           |              |
| Euro-Asian group | 0.0772           | 0.0750           | 0.0145       |

**Kimura-2-parameter distances for COI between *Stenodema calcarata* groups**

|                  | West Asian group | East Asian group | German group |
|------------------|------------------|------------------|--------------|
| West Asian group |                  |                  |              |
| East Asian group | 0.0715           |                  |              |
| German group     | 0.0860           | 0.0851           |              |
| Euro-Asian group | 0.0826           | 0.0803           | 0.0147       |

**P-distances for 16S rRNA between *Stenodema calcarata* groups**

|                             | West Asian group | East Asian group | Stavropol Province specimen |
|-----------------------------|------------------|------------------|-----------------------------|
| West Asian group            |                  |                  |                             |
| East Asian group            | 0.03             |                  |                             |
| Stavropol Province specimen | 0.0348           | 0.0389           |                             |
| Euro-Asian group            | 0.0361           | 0.0377           | 0.0286                      |

**Kimura-2-parameter distances for 16S rRNA between *Stenodema calcarata* groups**

|                             | West Asian group | East Asian group | Stavropol Province specimen |
|-----------------------------|------------------|------------------|-----------------------------|
| West Asian group            |                  |                  |                             |
| East Asian group            | 0.0306           |                  |                             |
| Stavropol Province specimen | 0.0359           | 0.0401           |                             |
| Euro-Asian group            | 0.0373           | 0.0388           | 0.0292                      |

**P-distances for COI between *Stenodema holsata* groups**

|                                     | Northern<br>and<br>Central<br>European<br>group | France<br>group |
|-------------------------------------|-------------------------------------------------|-----------------|
| Northern and Central European group |                                                 |                 |
| France group                        | 0.0176                                          |                 |
| Karachay-Cherkessia specimen        | 0.0328                                          | 0.0396          |

**Kimura-2-parameter distances for COI between *Stenodema holsata* groups**

|                                     | Northern<br>and<br>Central<br>European<br>group | France<br>group |
|-------------------------------------|-------------------------------------------------|-----------------|
| Northern and Central European group |                                                 |                 |
| France group                        | 0.0179                                          |                 |
| Karachay-Cherkessia specimen        | 0.0339                                          | 0.0412          |

**P-distances for 16S rRNA between *Stenodema holsata* groups**

|                                                                     |                                                 |         |
|---------------------------------------------------------------------|-------------------------------------------------|---------|
|                                                                     | Northern<br>and<br>Central<br>European<br>group |         |
| Northern and Central European group<br>Karachay-Cherkessia specimen |                                                 | 0.00538 |

**Kimura-2-parameter distances for 16S rRNA between *Stenodema holsata* groups**

|                                                                     |                                                 |         |
|---------------------------------------------------------------------|-------------------------------------------------|---------|
|                                                                     | Northern<br>and<br>Central<br>European<br>group |         |
| Northern and Central European group<br>Karachay-Cherkessia specimen |                                                 | 0.00541 |



**P-distances for COI between *Stenodema laevigata* groups**

|                                     | Main European clade | Crimea specimen | Voronezh Province and Germany clade | Greece specimen |
|-------------------------------------|---------------------|-----------------|-------------------------------------|-----------------|
| Main European clade                 |                     |                 |                                     |                 |
| Crimea specimen                     | 0.01225             |                 |                                     |                 |
| Voronezh Province and Germany clade | 0.02174             | 0.02562         |                                     |                 |
| Greece specimen                     | 0.01713             | 0.02065         | 0.00953                             |                 |
| Iran specimen                       | 0.01378             | 0.00889         | 0.02113                             | 0.01548         |

**Kimura-2-parameter distances for COI between *Stenodema laevigata* groups**

|                                     | Main European clade | Crimea specimen | Voronezh Province and Germany clade | Greece specimen |
|-------------------------------------|---------------------|-----------------|-------------------------------------|-----------------|
| Main European group                 |                     |                 |                                     |                 |
| Crimea specimen                     | 0.01239             |                 |                                     |                 |
| Voronezh Province and Germany group | 0.0222              | 0.2623          |                                     |                 |
| Greece specimen                     | 0.01741             | 0.02099         | 0.00961                             |                 |
| Iran specimen                       | 0.01398             | 0.00896         | 0.02156                             | 0.01568         |

**P-distance for COI between *Stenodema laevigata* groups**

|                  | Palearctic group | Nearctic group 1 | Nearctic group 2 |
|------------------|------------------|------------------|------------------|
| Palearctic group |                  |                  |                  |
| Nearctic group 1 | 0.0456           |                  |                  |
| Nearctic group 2 | 0.0455           | 0.0628           |                  |
| Nearctic group 3 | 0.0381           | 0.0553           | 0.0162           |

**Kimura-2-parameter distances for COI between *Stenodema laevigata* groups**

|                  | Palearctic group | Nearctic group 1 | Nearctic group 2 |
|------------------|------------------|------------------|------------------|
| Palearctic group |                  |                  |                  |
| Nearctic group 1 | 0.0475           |                  |                  |
| Nearctic group 2 | 0.0475           | 0.0664           |                  |
| Nearctic group 3 | 0.0396           | 0.0581           | 0.0165           |
